# Supplementary material for: Simulated EFAST Module Enhances Applied Abdominal Anatomy Learning in First- Year Medical Students
Source: Research Square preprint supplement (doi:10.21203/rs.3.rs-7953743/v1), 2025-11-21
Supplement: Supplementary file 1 [file 16449f280c378750033ff694.pdf]

**Title of Research Project:** Exposing first-year medical students to emergency sonography during anatomy training.

**Qualitative feedback for EFAST session Date:**

1. How did this learning session help you?

2. What did you like about this training session?

3. What did you dislike about this training session?

4. Any suggestions for improvement?

5. Any other comments?
